# Supplementary material for: γ-Radiolysis preparation of nanometer-sized cadmium sulphide quantum dots stabilized in nanozeolite X and ZSM-5
Source: Royal Society of Chemistry journal article supplement (doi:10.1039/c8nj00730f), 2018-01-01
Supplement: c8nj00730f1.pdf [file c8nj00730f1.pdf]

# Electronic Supporting Information

## **$\gamma$ -radiolysis preparation of nanometer-sized Cadmium Sulphide quantum dots stabilized in nanozeolite X and ZSM-5‡**

Vincent De Waele,<sup>a</sup> Abdelhafid Souici,<sup>b,d</sup> Ka-Lun Wong,<sup>c</sup> Svetlana Mintova,<sup>c</sup> and Mehran  
Mostafavi<sup>b</sup>

<sup>a</sup> Univ.Lille, CNRS, UMR 8516, LASIR, Laboratoire de Spectrochimie et Raman, F59 000  
Lille, France

<sup>b</sup> Laboratoire de Chimie Physique, UMR-8000, CNRS-UPS, Batiment 349, Orsay 91405,  
France.

<sup>c</sup> Laboratoire Catalyse et Spectrochimie, ENSICAEN – Université de Caen-CNRS, 6  
Boulevard du Maréchal Juin, 14050 Caen, France.

<sup>d</sup> Groupe de Crystallographie et simulation des matériaux, Laboratoire de Physico-Chimie des  
matériaux et Catalyze, Faculté des sciences exactes, Université de Bejaia 06000, Algeria.

K. L. Wong, present address: Natural Sciences and Science Education Academic  
Group, National Institute of Education, Nanyang Technological University, 1 Nanyang Walk,  
Singapore 637616

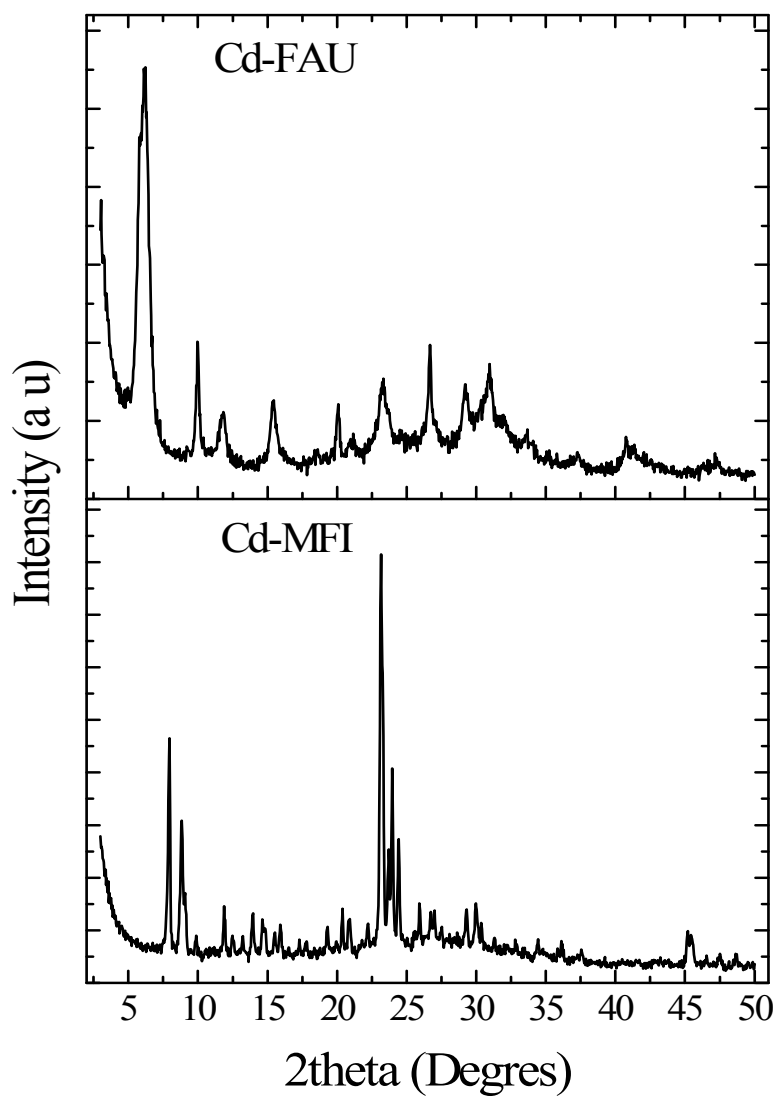

**Figure S1:** Powder X-ray diffraction patterns of nanosized Cd-FAU and Cd-MFI zeolites.

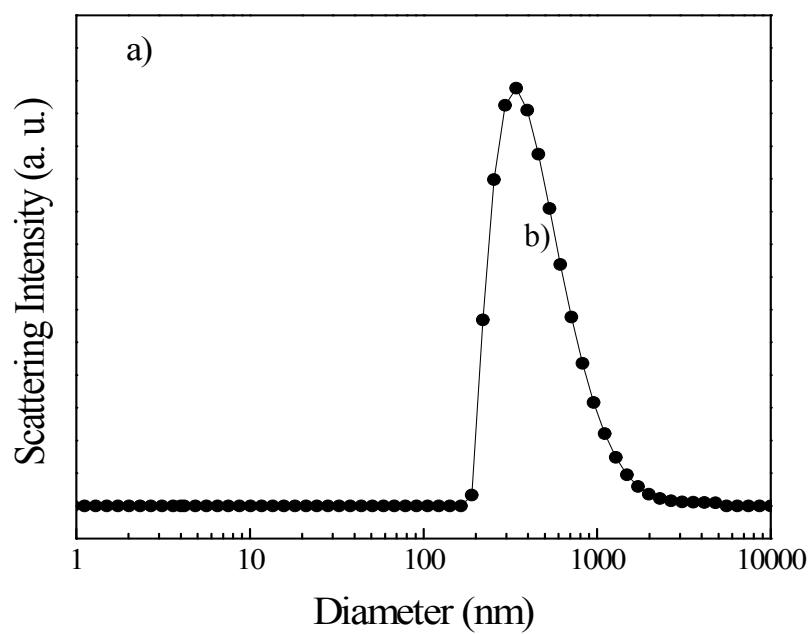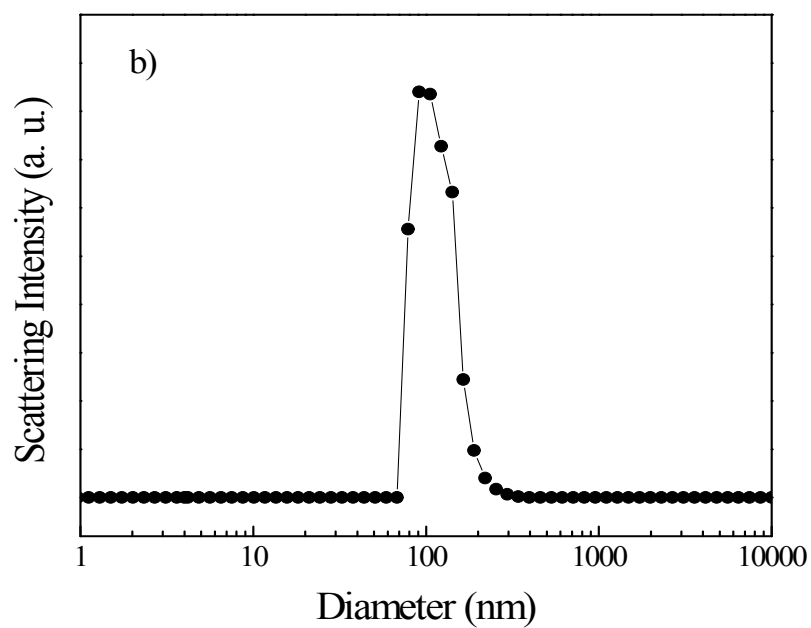

**Figure S2:** a) DLS data of FAU (X) zeolite and b) DLS data of MFI (ZSM-5) zeolite.

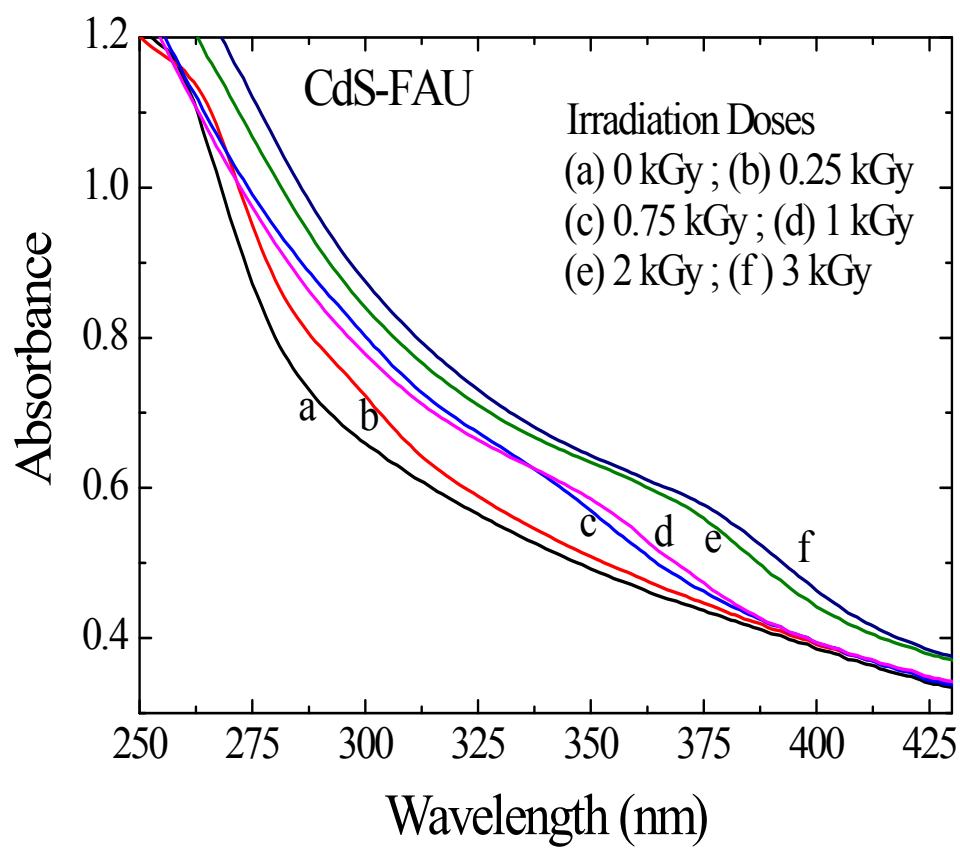

**Figure S3:** Absorption spectra of Cd-FAU and CdS-FAU recorded for different doses of irradiation.

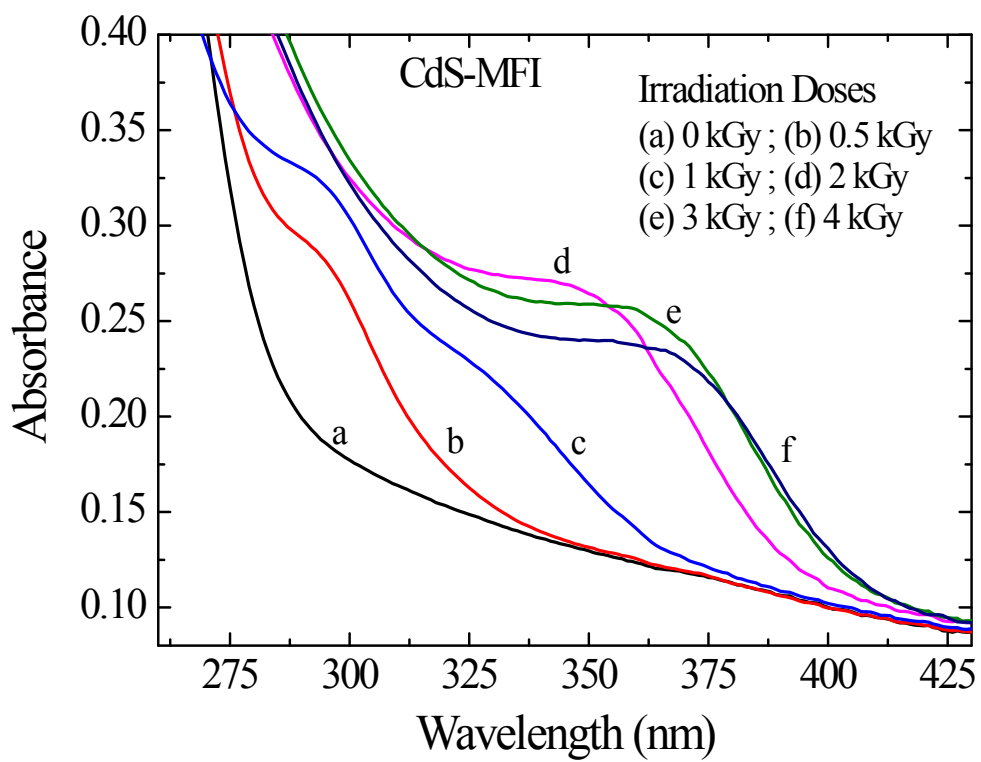

**Figure S4:** Absorption spectra of Cd-MFI and CdS-MFI recorded for different doses of irradiation.
